# Supplementary material for: In Vitro–In Vivo Correlations (IVIVC) for Predicting the Clinical Performance of Metronidazole Topical Creams Intended for Local Action
Source: MDPI journal article supplement (doi:10.3390/pharmaceutics15010268), 2023-01-12
Supplement: s1 [file s1]

The following tables contain raw data for the results presented in Table 1 of the manuscript:

A] The release rates/ apparent release constants (ARCs) obtained from IVRT studies using six vertical diffusion cells (VDCs) for the following products –

**Table S1.** 0.75% MTZ cream vs Metrocreme®, 0.75% MTZ (IVRT run 1)

| Product                                    | ARC values ( $\mu\text{g}/\text{cm}^2/\text{min}^{1/2}$ ) |       |       |       |       |       |                  |
|--------------------------------------------|-----------------------------------------------------------|-------|-------|-------|-------|-------|------------------|
|                                            | VDC 1                                                     | VDC 2 | VDC 3 | VDC 4 | VDC 5 | VDC 6 | Mean $\pm$ SD    |
| 0.75% MTZ Cream (T <sub>1</sub> )          | 32.05                                                     | 31.51 | 32.97 | 32.68 | 35.99 | 32.16 | 32.89 $\pm$ 1.60 |
| Metrocreme®, 0.75% MTZ (Reference – run 1) | 38.56                                                     | 40.09 | 35.82 | 36.99 | 35.47 | 39.88 | 37.80 $\pm$ 2.01 |

**Table S2.** 0.56% MTZ cream vs Metrocreme®, 0.75% MTZ (IVRT run 2)

| Product                                    | ARC values ( $\mu\text{g}/\text{cm}^2/\text{min}^{1/2}$ ) |       |       |       |       |       |                  |
|--------------------------------------------|-----------------------------------------------------------|-------|-------|-------|-------|-------|------------------|
|                                            | VDC 1                                                     | VDC 2 | VDC 3 | VDC 4 | VDC 5 | VDC 6 | Mean $\pm$ SD    |
| 0.56% MTZ cream (T <sub>2</sub> )          | 28.30                                                     | 25.87 | 27.38 | 28.66 | 26.98 | 27.34 | 27.42 $\pm$ 0.99 |
| Metrocreme®, 0.75% MTZ (Reference – run 2) | 37.13                                                     | 40.59 | 37.91 | 37.46 | 38.14 | 39.62 | 38.47 $\pm$ 1.35 |

**Table S3.** 0.95% MTZ cream vs Metrocreme®, 0.75% MTZ (IVRT run 2)

| Product                                    | ARC values ( $\mu\text{g}/\text{cm}^2/\text{min}^{1/2}$ ) |       |       |       |       |       |                  |
|--------------------------------------------|-----------------------------------------------------------|-------|-------|-------|-------|-------|------------------|
|                                            | VDC 1                                                     | VDC 2 | VDC 3 | VDC 4 | VDC 5 | VDC 6 | Mean $\pm$ SD    |
| 0.95% MTZ cream (T <sub>3</sub> )          | 50.24                                                     | 51.98 | 51.54 | 51.41 | 50.86 | 51.17 | 51.20 $\pm$ 0.60 |
| Metrocreme®, 0.75% MTZ (Reference – run 2) | 37.13                                                     | 40.59 | 37.91 | 37.46 | 38.14 | 39.62 | 38.47 $\pm$ 1.35 |

B] Area under the curve (AUC) values obtained following tape stripping (TS) studies

**Table S4.** AUC values for the reference and test products for each of the ten participants

| Participant ID | AUC values (µg.% skin depth)       |                                   |                                   |                                   |
|----------------|------------------------------------|-----------------------------------|-----------------------------------|-----------------------------------|
|                | Metrocreme®, 0.75% MTZ (Reference) | 0.75% MTZ cream (T <sub>1</sub> ) | 0.56% MTZ cream (T <sub>2</sub> ) | 0.95% MTZ cream (T <sub>3</sub> ) |
| 001            | 60.66                              | 63.94                             | 46.72                             | 80.17                             |
| 002            | 83.92                              | 93.74                             | 60.24                             | 121.73                            |
| 003            | 63.29                              | 58.67                             | 49.01                             | 74.41                             |
| 004            | 92.90                              | 73.48                             | 62.75                             | 97.12                             |
| 005            | 72.37                              | 75.12                             | 53.65                             | 87.60                             |
| 006            | 82.46                              | 90.68                             | 68.49                             | 95.84                             |
| 007            | 76.21                              | 76.33                             | 71.01                             | 101.83                            |
| 008            | 99.07                              | 95.56                             | 70.10                             | 115.56                            |
| 009            | 59.80                              | 61.01                             | 51.79                             | 83.09                             |
| 010            | 83.91                              | 87.70                             | 76.04                             | 110.48                            |
| Mean ± SD      | 77.46 ± 13.48                      | 77.62 ± 13.75                     | 60.98 ± 10.30                     | 96.78 ± 15.77                     |
